# Supplementary material for: Serial Measurements of Protein Biomarkers in Sepsis-Induced Acute Respiratory Distress Syndrome
Source: PubMed Central journal article supplement — Crit Care Explor. 2022 Oct 20;4(10):e0780. doi: 10.1097/CCE.0000000000000780 (PMC9586925; doi:10.1097/cce.0000000000000780), 2022-10-20
Supplement: cc9-4-e0780-s001.pdf [file cc9-4-e0780-s001.pdf]

**Supplemental Content for “Serial Measurements of Protein Biomarkers in Sepsis-Induced Acute Respiratory Distress Syndrome”**

Philip Yang, M.D., M.Sc.<sup>1</sup>, Elizabeth Iffrig, M.D., Ph.D.<sup>1</sup>, Frank Harris, B.S.<sup>2</sup>, Andre L. Holder, M.D., M.Sc.<sup>1</sup>, Greg S. Martin, M.D., M.Sc.<sup>1</sup>, Annette M. Esper, M.D., M.Sc.<sup>1</sup>

<sup>1</sup>Division of Pulmonary, Allergy, Critical Care, and Sleep Medicine, Emory University and Grady Memorial Hospital, Atlanta, Georgia, USA; <sup>2</sup>Biomarkers Core, Emory University and Children’s Healthcare of Atlanta, Atlanta, Georgia, USA

**TABLE OF CONTENTS**

|                                                                                                                             |    |
|-----------------------------------------------------------------------------------------------------------------------------|----|
| <b>Supplemental Table S1.</b> The Berlin definition for acute respiratory distress syndrome and special considerations..... | 3  |
| <b>Supplemental Table S2.</b> Comparison of biomarker levels by ARDS diagnosis .....                                        | 4  |
| <b>Supplemental Table S3.</b> Comparison of biomarker levels by mortality status .....                                      | 5  |
| <b>Supplemental Table S4.</b> Comparison of biomarker levels by ARDS diagnosis in subgroup of patients with COVID-19 .....  | 6  |
| <b>Supplemental Table S5.</b> Coefficients of variations for ELISA analyses .....                                           | 7  |
| <b>Supplemental Figure S1.</b> Flowchart of study enrollment and sample collection.....                                     | 8  |
| <b>Supplemental Figure S2.</b> Biomarker trends over time by ARDS diagnosis .....                                           | 9  |
| <b>Supplemental Figure S3.</b> Biomarker trends over time by mortality status .....                                         | 10 |

**Supplemental Table S1.** The Berlin definition for acute respiratory distress syndrome and special considerations

| Criteria                                  | Definition                                                                                                                                                                                                                                                                                                                                                                                                                                                                                                                                                                                                                                                                                                                                                                                                                                                                                                                                         |
|-------------------------------------------|----------------------------------------------------------------------------------------------------------------------------------------------------------------------------------------------------------------------------------------------------------------------------------------------------------------------------------------------------------------------------------------------------------------------------------------------------------------------------------------------------------------------------------------------------------------------------------------------------------------------------------------------------------------------------------------------------------------------------------------------------------------------------------------------------------------------------------------------------------------------------------------------------------------------------------------------------|
| Timing                                    | Within 1 week of a known clinical insult, which was sepsis or septic shock in this study                                                                                                                                                                                                                                                                                                                                                                                                                                                                                                                                                                                                                                                                                                                                                                                                                                                           |
| Chest imaging                             | Bilateral opacities, not fully explained by effusions, lung collapse, or nodules                                                                                                                                                                                                                                                                                                                                                                                                                                                                                                                                                                                                                                                                                                                                                                                                                                                                   |
| Origin of edema                           | Respiratory failure not fully explained by cardiac failure or fluid overload                                                                                                                                                                                                                                                                                                                                                                                                                                                                                                                                                                                                                                                                                                                                                                                                                                                                       |
| Oxygenation<br>Mild<br>Moderate<br>Severe | 200 mm Hg < PaO <sub>2</sub> /FiO <sub>2</sub> ≤ 300 mm Hg with PEEP or CPAP ≥ 5cmH <sub>2</sub> O<br>100 mm Hg < PaO <sub>2</sub> /FiO <sub>2</sub> ≤ 200 mm Hg with PEEP ≥ 5cmH <sub>2</sub> O<br>PaO <sub>2</sub> /FiO <sub>2</sub> ≤ 100 mm Hg with PEEP ≥ 5cmH <sub>2</sub> O                                                                                                                                                                                                                                                                                                                                                                                                                                                                                                                                                                                                                                                                 |
| Special considerations                    | <ul style="list-style-type: none"> <li>• Qualifying chest imaging and qualifying P/F ratio must be within 24 hours of each other.</li> <li>• The chest imaging abnormalities and P/F ratio &lt; 300 must persist for at least two days, whenever data is available.</li> <li>• For patients without P/F ratio available, S/F ratio was used as needed.</li> <li>• For participants receiving oxygen support with heated and humidified HFNC, the fraction of inspired oxygen (FiO<sub>2</sub>) setting on the HFNC was used to calculate the P/F or S/F ratios, but they were not considered to fulfill the Berlin definition of ARDS unless they subsequently received either non-invasive ventilation (NIV) or invasive mechanical ventilation (IMV).</li> <li>• For those subsequently requiring NIPPV or IMV, a new P/F or S/F ratio after initiation of positive-pressure ventilation was used as the qualifying measure for ARDS.</li> </ul> |

Abbreviations: PaO<sub>2</sub>/FiO<sub>2</sub> or P/F = ratio of partial pressure arterial oxygen to fraction of inspired oxygen, PEEP = positive end-expiratory pressure, CPAP = continuous positive airway pressure, S/F = ratio of peripheral oxygen saturation to fraction of inspired oxygen, HFNC = high-flow nasal cannula, ARDS = acute respiratory distress syndrome.

**Supplemental Table S2.** Comparison of biomarker levels by ARDS diagnosis

| <b>Biomarker</b>     | <b>ARDS<br/>(n=21, 18.9%)</b> | <b>Non-ARDS<br/>(n=90, 81.1%)</b> | <b>p-value*</b> |
|----------------------|-------------------------------|-----------------------------------|-----------------|
| <b>sRAGE levels</b>  |                               |                                   |                 |
| Day 1 (log[ng/mL])   | 1.042 ± 1.002                 | 0.629 ± 0.980                     | 0.09            |
| Day 2 (log[ng/mL])   | 0.853 ± 0.994                 | 0.535 ± 1.003                     | 0.22            |
| Day 3 (log[ng/mL])   | 0.608 ± 1.027                 | 0.480 ± 1.082                     | 0.67            |
| Δ day 1 to 2 (ng/mL) | -0.120 (-1.240 – 0.102)       | -0.076 (-0.367 – 0.284)           | 0.23            |
| Δ day 1 to 3 (ng/mL) | -0.514 (-1.552 – -0.075)      | -0.153 (-0.800 – 0.359)           | 0.06            |
| <b>Ang-2 levels</b>  |                               |                                   |                 |
| Day 1 (log[ng/mL])   | 1.825 ± 0.616                 | 1.893 ± 0.722                     | 0.69            |
| Day 2 (log[ng/mL])   | 1.836 ± 0.683                 | 1.745 ± 0.748                     | 0.64            |
| Day 3 (log[ng/mL])   | 1.720 ± 0.631                 | 1.672 ± 0.706                     | 0.80            |
| Δ day 1 to 2 (ng/mL) | 0.380 (-1.117 – 1.898)        | -0.511 (-1.979 – 0.190)           | 0.049           |
| Δ day 1 to 3 (ng/mL) | -0.440 (-1.324 – 0.558)       | -1.005 (-2.965 – 0.016)           | 0.19            |
| <b>SP-D levels</b>   |                               |                                   |                 |
| Day 1 (log[ng/mL])   | 1.921 ± 1.244                 | 1.361 ± 1.211                     | 0.06            |
| Day 2 (log[ng/mL])   | 2.009 ± 1.258                 | 1.456 ± 1.286                     | 0.10            |
| Day 3 (log[ng/mL])   | 1.900 ± 1.089                 | 1.606 ± 1.325                     | 0.41            |
| Δ day 1 to 2 (ng/mL) | 0.856 (-0.250 – 2.468)        | 0.214 (-1.025 – 2.363)            | 0.32            |
| Δ day 1 to 3 (ng/mL) | 1.084 (-1.923 – 3.948)        | 0.556 (-0.938 – 3.866)            | 0.68            |

Abbreviations: ARDS = acute respiratory distress syndrome, sRAGE = soluble receptor for advanced glycation end-products, Ang-2 = angiotensin-2, SP-D = surfactant protein-D.

Absolute biomarker levels on each day were log-transformed to approximate a normal distribution, and presented as mean ± standard deviation. Changes of the biomarker levels over time (denoted by the symbol Δ) are not log-transformed, and presented as median (interquartile range).

\*Two-sample t-test was used for calculating the p-values when comparing the means of the absolute biomarker levels, and Wilcoxon rank-sum test was used for calculating the p-values when comparing the medians of the changes of the biomarker levels over time.

**Supplemental Table S3.** Comparison of biomarker levels by mortality status

| <b>Biomarker</b>     | <b>Non-survivors<br/>(n=45, 40.5%)</b> | <b>Survivors<br/>(n=66, 59.5%)</b> | <b>p-value*</b> |
|----------------------|----------------------------------------|------------------------------------|-----------------|
| <b>sRAGE levels</b>  |                                        |                                    |                 |
| Day 1 (log[ng/mL])   | 0.999 ± 0.964                          | 0.508 ± 0.970                      | 0.01            |
| Day 2 (log[ng/mL])   | 0.848 ± 0.876                          | 0.428 ± 1.052                      | 0.04            |
| Day 3 (log[ng/mL])   | 0.736 ± 0.898                          | 0.367 ± 1.141                      | 0.13            |
| Δ day 1 to 2 (ng/mL) | -0.005 (-0.642 – 0.595)                | -0.112 (-0.412 – 0.098)            | 0.27            |
| Δ day 1 to 3 (ng/mL) | -0.096 (-1.281 – 0.389)                | -0.234 (-0.792 – 0.207)            | 0.90            |
| <b>Ang-2 levels</b>  |                                        |                                    |                 |
| Day 1 (log[ng/mL])   | 2.065 ± 0.673                          | 1.754 ± 0.697                      | 0.02            |
| Day 2 (log[ng/mL])   | 2.044 ± 0.652                          | 1.581 ± 0.732                      | 0.002           |
| Day 3 (log[ng/mL])   | 1.973 ± 0.652                          | 1.508 ± 0.656                      | 0.002           |
| Δ day 1 to 2 (ng/mL) | 0.050 (-2.051 – 1.898)                 | -0.563 (-1.535 – 0.062)            | 0.12            |
| Δ day 1 to 3 (ng/mL) | -0.829 (-3.856 – 0.381)                | -0.744 (-2.424 – -0.020)           | 0.91            |
| <b>SP-D levels</b>   |                                        |                                    |                 |
| Day 1 (log[ng/mL])   | 1.792 ± 1.287                          | 1.245 ± 1.150                      | 0.02            |
| Day 2 (log[ng/mL])   | 1.772 ± 1.321                          | 1.418 ± 1.265                      | 0.18            |
| Day 3 (log[ng/mL])   | 1.975 ± 1.182                          | 1.477 ± 1.314                      | 0.08            |
| Δ day 1 to 2 (ng/mL) | -0.093 (-1.913 – 2.468)                | 0.303 (-0.542 – 2.370)             | 0.26            |
| Δ day 1 to 3 (ng/mL) | 0.657 (-3.188 – 6.681)                 | 0.676 (-0.661 – 3.231)             | 0.37            |

Abbreviations: sRAGE = soluble receptor for advanced glycation end-products, Ang-2 = angiotensin-2, SP-D = surfactant protein-D.

Absolute biomarker levels on each day were log-transformed to approximate a normal distribution, and presented as mean ± standard deviation. Changes of the biomarker levels over time (denoted by the symbol Δ) are not log-transformed, and presented as median (interquartile range).

\*Two-sample t-test was used for calculating the p-values when comparing the means of the absolute biomarker levels, and Wilcoxon rank-sum test was used for calculating the p-values when comparing the medians of the changes of the biomarker levels over time.

**Supplemental Table S4.** Comparison of biomarker levels by ARDS diagnosis in subgroup of patients with COVID-19

| <b>Biomarker</b>     | <b>ARDS<br/>(n=8, 42.1%)</b> | <b>Non-ARDS<br/>(n=11, 57.9%)</b> | <b>p-value*</b> |
|----------------------|------------------------------|-----------------------------------|-----------------|
| sRAGE levels         |                              |                                   |                 |
| Day 1 (log[ng/mL])   | 1.389 ± 0.637                | 1.110 ± 0.767                     | 0.41            |
| Day 2 (log[ng/mL])   | 1.168 ± 0.735                | 0.951 ± 0.587                     | 0.49            |
| Day 3 (log[ng/mL])   | 1.129 ± 0.702                | 0.838 ± 0.446                     | 0.32            |
| Δ day 1 to 2 (ng/mL) | -0.120 (-1.240 – 0.102)      | -0.076 (-0.367 – 0.284)           | 0.51            |
| Δ day 1 to 3 (ng/mL) | -0.514(-1.552 – -0.075)      | -0.153 (-0.799 – 0.359)           | 0.67            |
| Ang-2 levels         |                              |                                   |                 |
| Day 1 (log[ng/mL])   | 1.589 ± 0.470                | 1.811 ± 0.738                     | 0.46            |
| Day 2 (log[ng/mL])   | 1.493 ± 0.481                | 1.962 ± 0.724                     | 0.14            |
| Day 3 (log[ng/mL])   | 1.521 ± 0.652                | 1.873 ± 0.776                     | 0.33            |
| Δ day 1 to 2 (ng/mL) | 0.380 (-1.117 – 1.898)       | -0.511 (-1.979 – 0.190)           | 0.16            |
| Δ day 1 to 3 (ng/mL) | -0.440 (-1.324 – 0.558)      | -1.005 (-2.965 – 0.016)           | 0.74            |
| SP-D levels          |                              |                                   |                 |
| Day 1 (log[ng/mL])   | 1.882 ± 1.241                | 1.551 ± 1.598                     | 0.63            |
| Day 2 (log[ng/mL])   | 1.931 ± 1.284                | 2.034 ± 1.451                     | 0.88            |
| Day 3 (log[ng/mL])   | 1.536 ± 1.079                | 2.239 ± 1.114                     | 0.21            |
| Δ day 1 to 2 (ng/mL) | 0.856 (-0.250 – 2.468)       | 0.214 (-1.025 – 2.363)            | 0.57            |
| Δ day 1 to 3 (ng/mL) | 1.084 (-1.923 – 3.948)       | 0.556 (-0.938 – 3.866)            | 0.43            |

Abbreviations: ARDS = acute respiratory distress syndrome, COVID-19 = coronavirus disease-2019, sRAGE = soluble receptor for advanced glycation end-products, Ang-2 = angiotensin-2, SP-D = surfactant protein-D.

Absolute biomarker levels on each day were log-transformed to approximate a normal distribution, and presented as mean ± standard deviation. Changes of the biomarker levels over time (denoted by the symbol Δ) are not log-transformed, and presented as median (interquartile range).

\*Two-sample t-test was used for calculating the p-values when comparing the means of the absolute biomarker levels, and Wilcoxon rank-sum test was used for calculating the p-values when comparing the medians of the changes of the biomarker levels over time.

**Supplemental Table S5.** Coefficients of variations for ELISA analyses

| <b>Biomarker</b> | <b>Inter-assay coefficient of variation</b> |
|------------------|---------------------------------------------|
| sRAGE            | 4.98%                                       |
| Ang-2            | 4.94%                                       |
| SP-D             | 7.40%                                       |

Abbreviations: ELISA = enzyme-linked immunosorbent assay, sRAGE = soluble receptor for advanced glycation end-products, Ang-2 = angiotensin-2, SP-D = surfactant protein-D. Coefficients of variation <15% is generally considered acceptable.

**Supplemental Figure S1.** Flowchart of study enrollment and sample collection

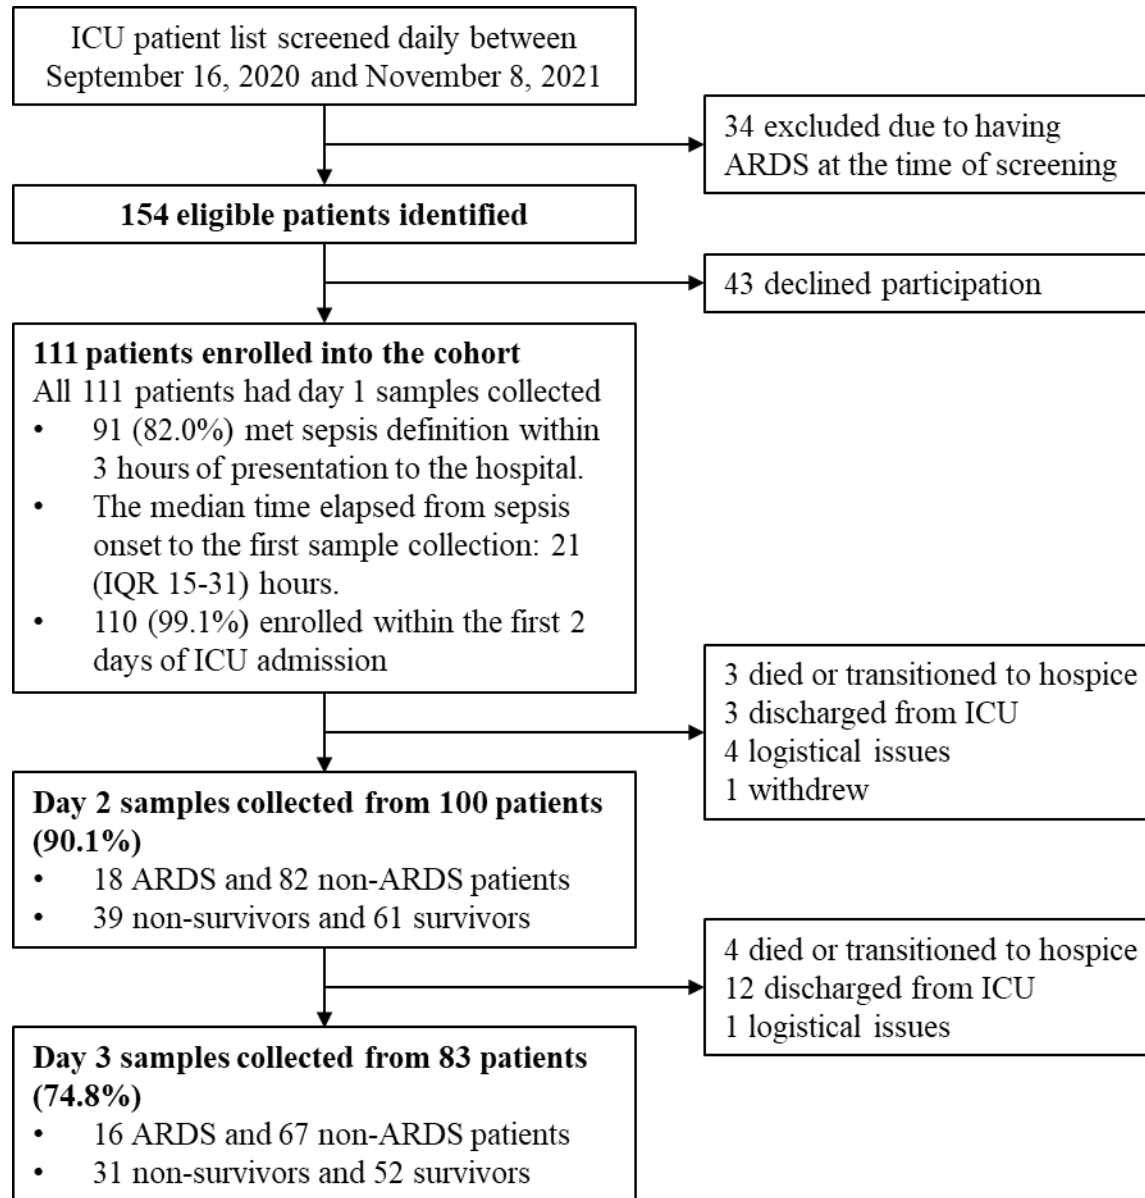



**Supplemental Figure S2.** Biomarker trends over time by ARDS diagnosis

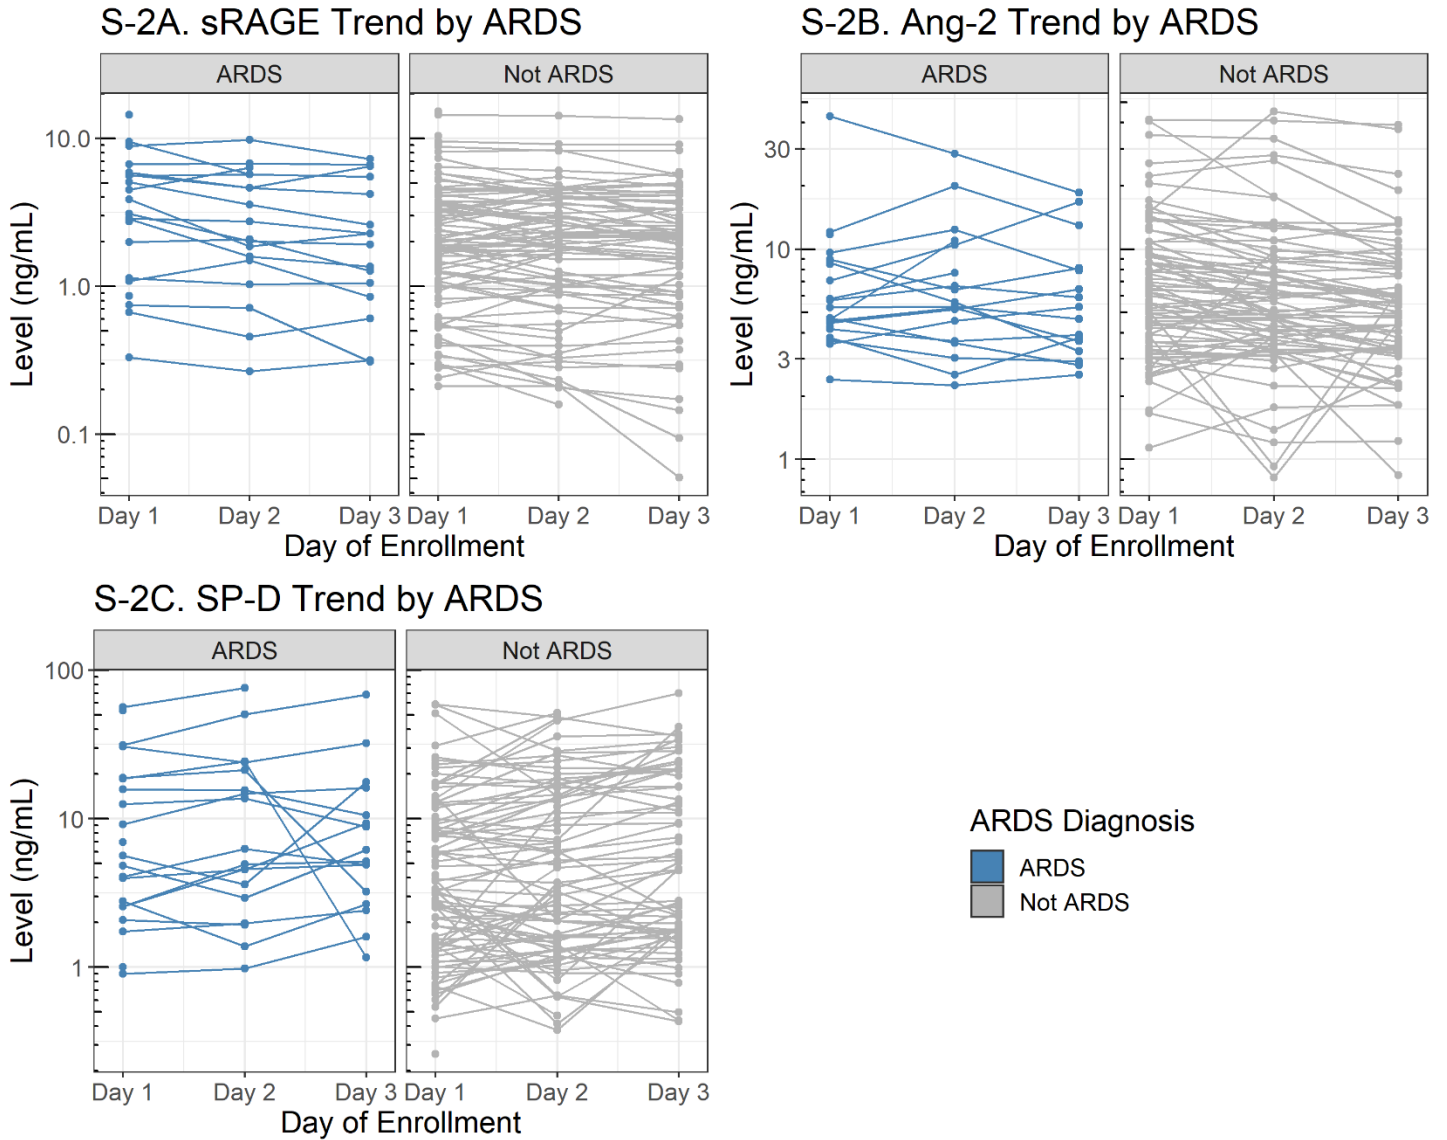

Abbreviations: ARDS = acute respiratory distress syndrome, sRAGE = soluble receptor for advanced glycation end-products, Ang-2 = angiotensin-2, SP-D = surfactant protein D. Each panel shows the trends of the three biomarker levels over time in each patient. Number of patients for each day was: 111 on day 1 (21 ARDS vs. 90 non-ARDS), 100 on day 2 (18 ARDS vs. 82 non-ARDS), and 83 on day 3 (16 ARDS vs. 67 non-ARDS).

**Supplemental Figure S3.** Biomarker trends over time by mortality status

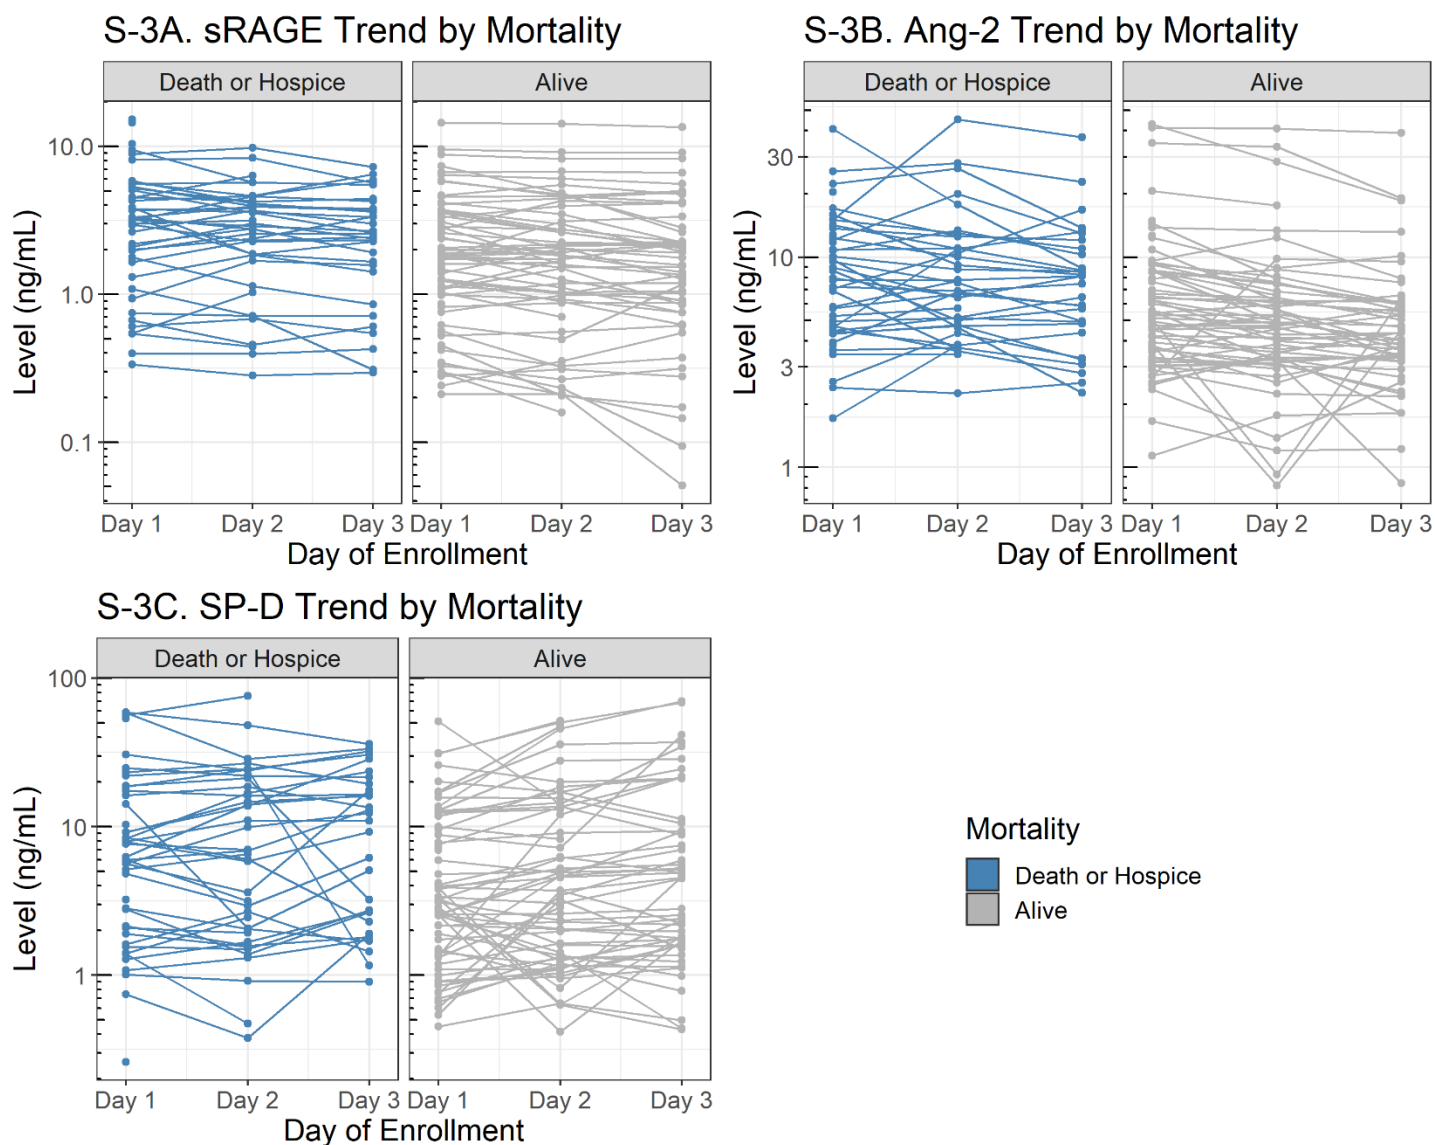

Abbreviations: sRAGE = soluble receptor for advanced glycation end-products, Ang-2 = angiotensin-2, SP-D = surfactant protein D. Each panel shows the trends of the three biomarker levels over time in each patient. Number of patients for each day was: 111 on day 1 (45 death/hospice vs. 66 alive), 100 on day 2 (39 death/hospice vs. 61 alive) and 83 on day 3 (31 death/hospice vs. 52 alive).
